# Supplementary material
Source: PubMed Central journal article supplement (PMC8349923)
Supplement: NIHMS1701869-supplement-Supplemental_Tables.pdf [file NIHMS1701869-supplement-Supplemental_Tables.pdf]

|                                                                                                                                                                                                                                                                                                                                                                                                    |                                                                                                                                                                                                                                                                                                                                                                                                                                                              |
|----------------------------------------------------------------------------------------------------------------------------------------------------------------------------------------------------------------------------------------------------------------------------------------------------------------------------------------------------------------------------------------------------|--------------------------------------------------------------------------------------------------------------------------------------------------------------------------------------------------------------------------------------------------------------------------------------------------------------------------------------------------------------------------------------------------------------------------------------------------------------|
| <p>Neurologic, Psychiatric and/or Rheumatologic<br/> Plagiocephaly and/or craniosynostosis (<i>n</i>=5)<br/> Sensory sensitivity (<i>n</i>=2)<br/> Tic (<i>n</i>=1)<br/> Ehlers-Danlos Syndrome (<i>n</i>=1)<br/> Postural orthostatic tachycardia syndrome (<i>n</i>=1)<br/> Dyslexia (<i>n</i>=1)<br/> Attention deficit hyperactivity disorder (<i>n</i>=1)<br/> Foot pronation(<i>n</i>=1)</p> | <p>Otolaryngologic<br/> Hearing loss (<i>n</i>=3)<br/> Tympanostomy (<i>n</i>=2)</p> <p>Prematurity and Associated Complications<br/> Gestational age 26 weeks with chronic lung disease (<i>n</i>=1)<br/> Gestational age 33 weeks due to fetal hydrops (<i>n</i>=1)<br/> Gestational age 25 weeks with intraventricular hemorrhage (<i>n</i>=1)</p>                                                                                                        |
| <p>Ophthalmologic<br/> Pupil asymmetry (<i>n</i>=2)<br/> Amblyopia (<i>n</i>=1)<br/> Ptosis (<i>n</i>=1)<br/> Intermittent diplopia (<i>n</i>=1)<br/> Coloboma with microphthalmia (<i>n</i>=1)</p>                                                                                                                                                                                                | <p>Genetic<br/> KMT2C gene mutation associated with congenital heart disease, developmental delay and autism spectrum disorder (Kleestra syndrome)<br/> SACS gene mutation associated with periodic fevers, tic, tethered cord and leg dystonia (<i>n</i>=1)<br/> Multiple congenital anomalies (short long bones, hypospadias, bifid uvula, sacral dimple, joint hypermobility, tics and learning difficulties without identified mutation (<i>n</i>=1)</p> |
| <p>Cardiac<br/> Ventricular septal defect requiring surgical repair (<i>n</i>=2)<br/> Unspecified congenital heart defect (<i>n</i>=1)<br/> Murmur with normal echocardiogram (<i>n</i>=1)<br/> Heart palpitations (<i>n</i>=1)</p>                                                                                                                                                                |                                                                                                                                                                                                                                                                                                                                                                                                                                                              |
| <p>Gastrointestinal<br/> Gastroesophageal reflux (<i>n</i>=23)<br/> Inguinal hernia (<i>n</i>=1)<br/> Milk protein allergy (<i>n</i>=1)<br/> Viral hepatitis (<i>n</i>=1)</p>                                                                                                                                                                                                                      |                                                                                                                                                                                                                                                                                                                                                                                                                                                              |

**Supplemental Table S1:** Medical comorbidities of children with BPT as reported by their parents/caregivers. Total number of comorbidities is greater than the number of children with any comorbidity as some reported more than one condition.

| <b>Testing and Evaluations Performed</b>                                                                                                                                                                                                                                                                               | <b>Abnormal Findings</b>                                                                                                                                                                                                                                                                                                                                                                                                                |
|------------------------------------------------------------------------------------------------------------------------------------------------------------------------------------------------------------------------------------------------------------------------------------------------------------------------|-----------------------------------------------------------------------------------------------------------------------------------------------------------------------------------------------------------------------------------------------------------------------------------------------------------------------------------------------------------------------------------------------------------------------------------------|
| Neuroimaging<br>MRI brain ( <i>n</i> =40)<br>MRI spine ( <i>n</i> =12)<br>MRI orbit ( <i>n</i> =1)<br>CT head ( <i>n</i> =6)<br>CT neck ( <i>n</i> =1)<br>CT unspecified ( <i>n</i> =2)<br>X-ray neck ( <i>n</i> =1)<br>X-ray spine ( <i>n</i> =1)<br>Head ultrasound ( <i>n</i> =4)<br>Neck ultrasound ( <i>n</i> =1) | MRI brain: Chiari malformation ( <i>n</i> =1); dysgenesis corpus callosum ( <i>n</i> =1); “incidental small cyst” ( <i>n</i> =1); white matter injury of unknown etiology ( <i>n</i> =1); enlarged vestibular aqueduct ( <i>n</i> =1)<br><br>MRI spine: Tethered cord in patient with SACS gene mutation (variant of unknown significance) ( <i>n</i> =1)<br><br>Neck ultrasound: Lateral neck cyst ( <i>n</i> =1)                      |
| EEG ( <i>n</i> =39)                                                                                                                                                                                                                                                                                                    | Posterior slowing at 12 months of age, felt to be “normal variant” ( <i>n</i> =1)                                                                                                                                                                                                                                                                                                                                                       |
| Lumbar puncture ( <i>n</i> =4)                                                                                                                                                                                                                                                                                         | None reported                                                                                                                                                                                                                                                                                                                                                                                                                           |
| Genetic testing ( <i>n</i> =8)<br>Specific testing for CACNA1A ( <i>n</i> =2)                                                                                                                                                                                                                                          | KMT2C mutation ( <i>n</i> =1): encodes histone methyltransferase; associated with Kleefstra syndrome 2 characterized by intellectual disability, hypotonia, speech delay and facial dysmorphism<br><br>SACS gene variant of unknown significance ( <i>n</i> =1): associated with Autosomal recessive spastic ataxia of Carlevoix-Saguenay (ARSACS), characterized by dystonia, ataxia, spasticity, amyotrophy, nystagmus and dysarthria |
| Ophthalmologic evaluation ( <i>n</i> =20)<br>By an ophthalmologist ( <i>n</i> =14)<br>By an optometrist ( <i>n</i> =2)<br>By a neuro-ophthalmologist ( <i>n</i> =1)<br>Vision screen, NOS ( <i>n</i> =3)<br>“Eye exam”, NOS ( <i>n</i> =2)                                                                             | Amblyopia ( <i>n</i> =1); pupil asymmetry ( <i>n</i> =2); ptosis ( <i>n</i> =1); coloboma with microphthalmia ( <i>n</i> =1); glasses prescription needed in left eye ( <i>n</i> =1)                                                                                                                                                                                                                                                    |
| Otolaryngologic evaluation ( <i>n</i> =14)<br>Hearing test ( <i>n</i> =5)<br>Vestibular testing ( <i>n</i> =2)<br>“ENT” ( <i>n</i> =7)                                                                                                                                                                                 | Abnormal hearing, felt to be unrelated to BPT per parental report ( <i>n</i> =3; 1 with KMT2C mutation); right-sided vestibular deficit, felt to be unrelated to BPT per parental report ( <i>n</i> =1)                                                                                                                                                                                                                                 |
| Lab testing ( <i>n</i> =8)                                                                                                                                                                                                                                                                                             | Elevated urinary dopamine (normal MIBG scan and renal ultrasound) ( <i>n</i> =1)                                                                                                                                                                                                                                                                                                                                                        |
| Gastroenterological evaluation ( <i>n</i> =4)<br>Abdominal ultrasound ( <i>n</i> =2)<br>Abdominal MRI ( <i>n</i> =1)<br>Upper GI series ( <i>n</i> =1)                                                                                                                                                                 | None reported                                                                                                                                                                                                                                                                                                                                                                                                                           |
| Orthopedic evaluation ( <i>n</i> =4)                                                                                                                                                                                                                                                                                   | None reported                                                                                                                                                                                                                                                                                                                                                                                                                           |
| Allergy testing ( <i>n</i> =2)                                                                                                                                                                                                                                                                                         | None reported                                                                                                                                                                                                                                                                                                                                                                                                                           |
| Cognitive testing ( <i>n</i> =1)                                                                                                                                                                                                                                                                                       | None reported                                                                                                                                                                                                                                                                                                                                                                                                                           |
| Hair mineral testing ( <i>n</i> =1)                                                                                                                                                                                                                                                                                    | None reported                                                                                                                                                                                                                                                                                                                                                                                                                           |
| Neurosurgical evaluation ( <i>n</i> =1)                                                                                                                                                                                                                                                                                | None reported                                                                                                                                                                                                                                                                                                                                                                                                                           |

**Supplemental Table S2:** Diagnostic evaluations performed and associated abnormal findings as reported

by their parents/caregivers. Total number of evaluations is greater than the number of patients as many

patients had more than one test performed. MRI: magnetic resonance imaging; CT: computed tomography; EEG: electroencephalogram; NOS: not otherwise specified; ENT: Ear, nose and throat; GI: gastrointestinal; MIBG: metaiodobenzylguanidine
